# Supplementary material for: A leaf area index, LAI, data set acquired in Sahelian rangelands (Gourma, Mali) over the 2005–2017 period
Source: Copernicus journal article supplement (doi:10.5194/essd-2018-113), 2018-12-10
Supplement: Supplementary file [file essd-2018-113-AC1-supplement.pdf]

Figure S1: Field photographs of the 4 monitored sites on sandy soils, taken during the dry (left) and the wet (right) seasons, from the same location, at the starting point of the sampling transect: a) *Agoufou* (#17, Ag), b) *Timbadior* (#18, Ti), c) *Hombori Hondo* (#19, Ho), d) *Tara* (#31, Ta).

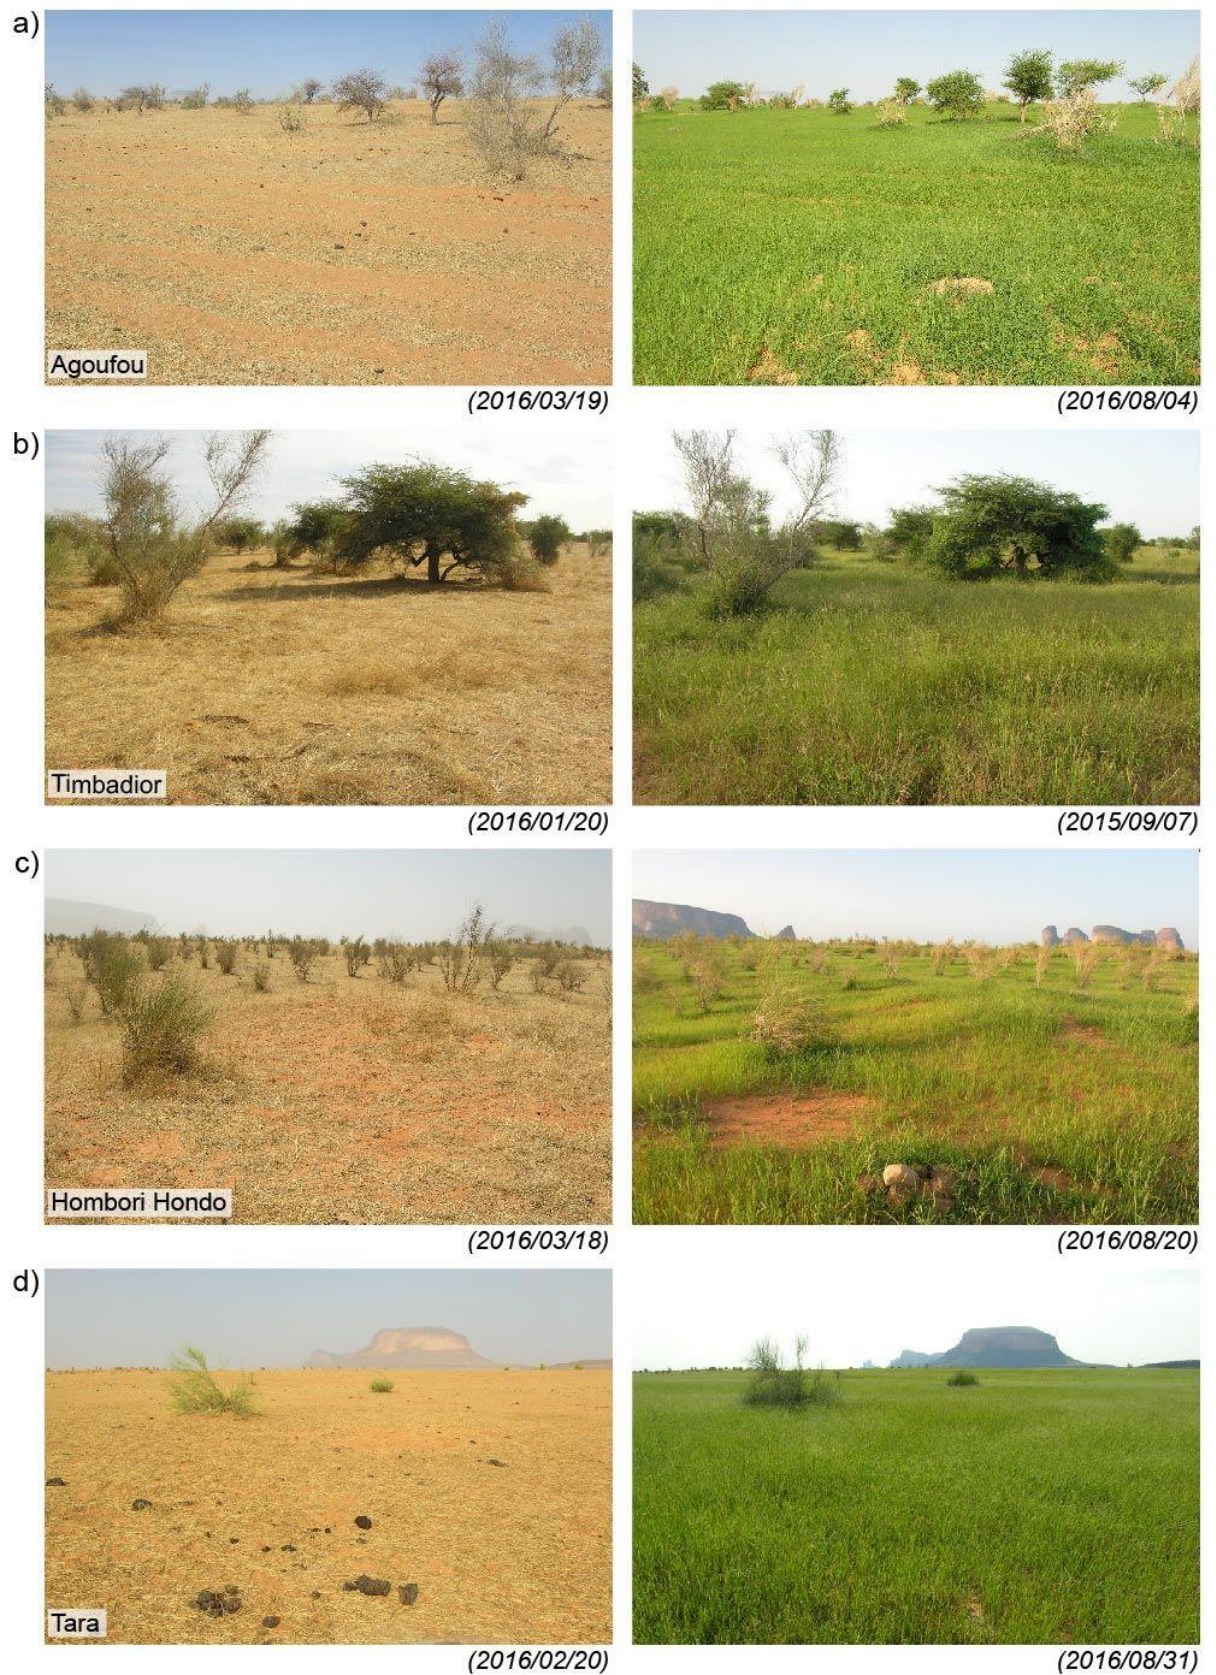



Figure S2: Field photographs of the monitored sites on loamy-clayed soils a) *Kelma forest* (#21, Kf) and b) *Kelma plain* (# 21b, Kp); on erosion surface c) *Eguerit* (#40, Eg), and d) a millet field at *Bilantao* (#41, Bi), taken during the dry (left) and the wet (right) seasons from the same location, at the starting point of the sampling transect.

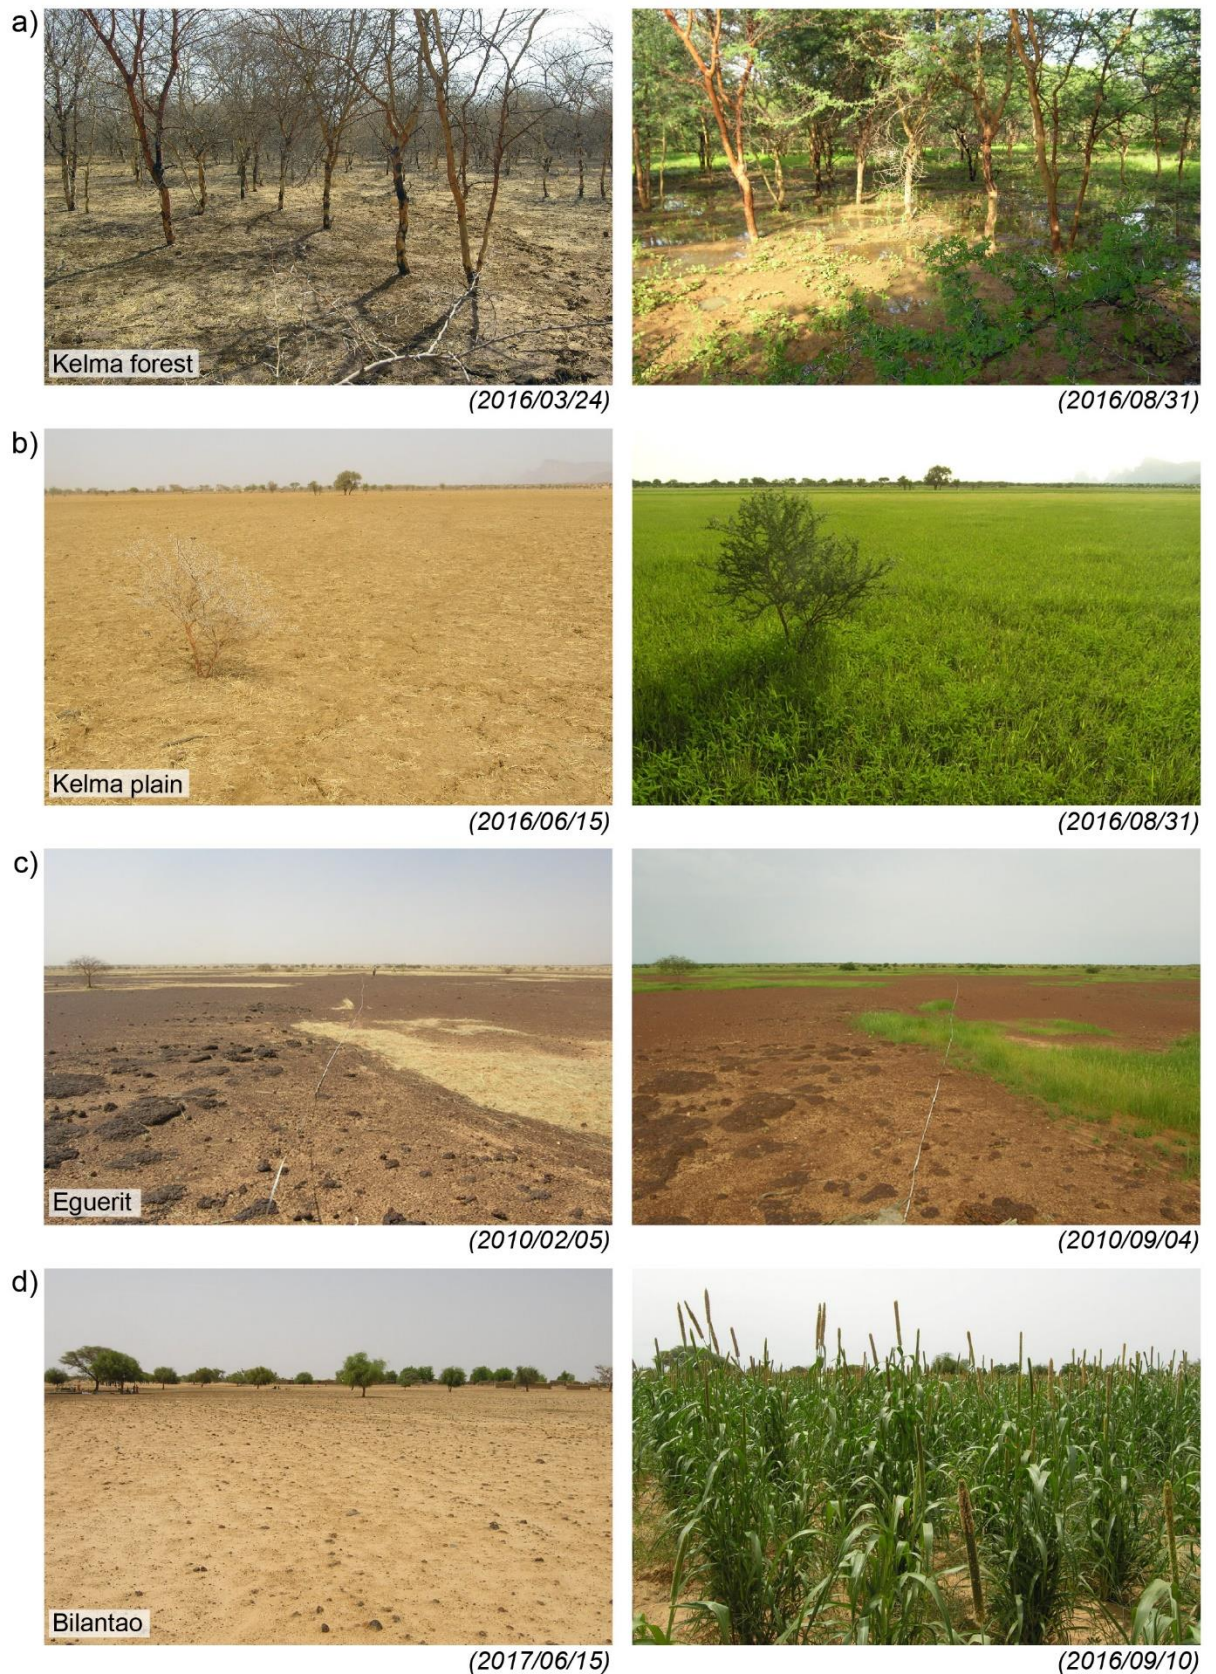

**Table S1. General characteristics of the monitored sites.**

| Site name (code number <sup>a</sup> )<br>Central coordinates<br>(longitude, latitude) | Vegetation<br>type                                      | Dominant herbaceous<br>species                                                                                                                                                                       | Dominant woody species                                                                                                                                  | Soil<br>type                       | Grazing<br>pressure |
|---------------------------------------------------------------------------------------|---------------------------------------------------------|------------------------------------------------------------------------------------------------------------------------------------------------------------------------------------------------------|---------------------------------------------------------------------------------------------------------------------------------------------------------|------------------------------------|---------------------|
| Agoufou (#17)<br><br>(15.339°N, 1.484°W)                                              | Open woody<br>savannah                                  | <i>Cenchrus biflorus</i> ,<br><i>Aristida mutabilis</i> ,<br><i>Zornia glochidiata</i> ,<br><i>Tragus berteroniamus</i>                                                                              | <i>Acacia raddiana</i> ,<br><i>Combretum glutinosum</i> ,<br><i>Balanites aegyptiaca</i> ,<br><i>Acacia senegal</i> ,<br><i>Leptadenia pyrotechnica</i> | Sand                               | High                |
| Eguerit (#40)<br><br>(15.504°N, 1.397°W)                                              | Scattered<br>shrubs, herbs<br>on loamy<br>deposits      | <i>Schoenefeldia gracilis</i> ,<br><i>Aristida adscensionis</i> ,<br><i>Pennisetum violaceum</i> ,<br><i>Panicum laetum</i>                                                                          | <i>Acacia ehrenbergiana</i> ,<br><i>Commiphora Africana</i> ,<br><i>Maerua crassifolia</i> ,<br><i>Ziziphus mauritiana</i>                              | Gravels<br>and<br>loamy<br>patches | Low                 |
| Timbador (#18)<br><br>(15.332°N, 1.546°W)                                             | Open woody<br>savannah                                  | <i>Cenchrus biflorus</i> ,<br><i>Aristida mutabilis</i> ,<br><i>Zornia glochidiata</i> ,<br><i>Tragus berteroniamus</i>                                                                              | <i>Acacia raddiana</i> ,<br><i>Combretum glutinosum</i> ,<br><i>Balanites aegyptiaca</i> ,<br><i>Acacia senegal</i> ,<br><i>Leptadenia pyrotechnica</i> | Sand                               | Moderate            |
| Hombori Hondo (#19)<br><br>(15.322°N, 1.698°W)                                        | Open shrub<br>savannah                                  | <i>Aristida sieberiana</i> ,<br><i>Chrozophora<br/>senegalensis</i> ,<br><i>Heliotropium strigosum</i>                                                                                               | <i>Balanites aegyptiaca</i> ,<br><i>Leptadenia pyrotechnica</i>                                                                                         | Sand                               | High                |
| Kelma Forest (#21)<br>and<br>Kelma Herbs (#21)<br><br>15.219°N, 1.566°W               | Seasonally<br>inundated<br>open <i>Acacia</i><br>forest | <i>Aeschynomene sensitive</i> ,<br><i>Echinochloa colona</i> ,<br><i>Sporobolus hevolvus</i>                                                                                                         | <i>Acacia seyal</i> ,<br><i>Acacia nilotica</i> ,<br><i>Balanites aegyptiaca</i>                                                                        | Clay,<br>loam                      | High                |
| Kelma Plain (#21b)<br><br>(15.219°N, 1.573°W)                                         | Seasonally<br>inundated<br>plain                        | <i>Aeschynomene sensitive</i> ,<br><i>Echinochloa colona</i> ,<br><i>Panicum laetum</i> ,<br><i>Sporobolus hevolvus</i>                                                                              | <i>Acacia seyal</i> ,<br><i>Balanites aegyptiaca</i>                                                                                                    | Silt,<br>loam                      | High                |
| Tara (#31)<br><br>(15.230°N, 1.583°W)                                                 | Open woody<br>savannah                                  | <i>Cenchrus biflorus</i> ,<br><i>Aristida sieberiana</i> ,<br><i>Dactyloctenium<br/>aegyptium</i> ,<br><i>Zornia glochidiata</i> ,<br><i>Tragus berteroniamus</i> ,<br><i>Schoenefeldia gracilis</i> | <i>Acacia raddiana</i> ,<br><i>Balanites aegyptiaca</i> ,<br><i>Combretum glutinosum</i> ,<br><i>Leptadenia pyrotechnica</i>                            | Sand                               | High                |
| Bilantao (#41)<br><br>(15.285°N, 1.558°W)                                             | Millet field<br>( <i>Pennisetum<br/>glaucum</i> )       | <i>Pennisetum glaucum</i>                                                                                                                                                                            | <i>Acacia raddiana</i> ,<br><i>Balanites aegyptiaca</i> ,<br><i>Faidherbia albida</i>                                                                   | Sand                               | Low                 |

<sup>a</sup>Site code number refers to Hiernaux et al. (2009a)

**Table S2. Top soil texture data in terms of sand, clay and silt contents (%) for the monitored sites: Agoufou, Bilantao, Eguerit, Hombori Hondo, Kelma forest, Kelma plain, Tara and Timbadior. Particles size are defined as clay (<0.002 mm), silt (<0.05 mm), and sand (<2 mm). Soil texture data were taken from Hiernaux et al. (1984), except for Bilantao, Kelma plain and Tara which soil texture was analysed in 2018 by the Laboratoire Sol-Eau-Plantes (Institut d’Economie Rurale, Sotuba, Mali).**

| Depth (cm) | Agoufou (#17 <sup>a</sup> )<br>(15.339°N, 1.484°W) |      |      | Bilantao (#41)<br>(15.°N, 1.4°W) |      |      | Eguerit (#40)<br>(15.50°N, 1.40°W) |      |      | Kelma Forest (#21)<br>(15.219°N, 1.566°W) |      |      |
|------------|----------------------------------------------------|------|------|----------------------------------|------|------|------------------------------------|------|------|-------------------------------------------|------|------|
|            | Sand                                               | Silt | Clay | Sand                             | Silt | Clay | Sand                               | Silt | Clay | Sand                                      | Silt | Clay |
| 0-6        | 91.0                                               | 3.3  | 4.6  | 96.9                             | 1.0  | 2.1  | 43.6                               | 29.8 | 26.3 | 47.8                                      | 27.5 | 24.5 |
| 6-12       | 91.1                                               | 3.2  | 5.1  | 97.4                             | 1.3  | 1.3  | 43.6                               | 27.9 | 28.1 | 40.3                                      | 19.4 | 40.0 |
| 12-25      | 89.7                                               | 4.1  | 5.8  | 96.8                             | 1.6  | 1.6  | 30.2                               | 27.4 | 42.1 | 35.1                                      | 19.8 | 45.1 |
| 25-50      | 90.9                                               | 3.2  | 5.5  | 93.5                             | 4.9  | 1.6  | -                                  | -    | -    | 31.6                                      | 16.1 | 52.4 |
| 50-100     | 92.0                                               | 1.9  | 5.8  | 87.1                             | 9.7  | 3.2  | -                                  | -    | -    | 30.1                                      | 21   | 48.9 |

| Depth (cm) | Kelma Plain (#21b)<br>(15.219°N, 1.573°W) |      |      | Hombori Hondo (#19)<br>(15.50°N, 1.40°W) |      |      | Tara (#31)<br>(15.219°N, 1.566°W) |      |      | Timbadior (#18)<br>(15.339°N, 1.484°W) |      |      |
|------------|-------------------------------------------|------|------|------------------------------------------|------|------|-----------------------------------|------|------|----------------------------------------|------|------|
|            | Sand                                      | Silt | Clay | Sand                                     | Silt | Clay | Sand                              | Silt | Clay | Sand                                   | Silt | Clay |
| 0-6        | 50                                        | 49   | 1    | 90.5                                     | 1.1  | 6.7  | 94.0                              | 2.0  | 4.0  | 92.0                                   | 2.8  | 4.9  |
| 6-12       | 20                                        | 78   | 2    | 94.1                                     | 1.4  | 3.6  | 94.0                              | 2.0  | 4.0  | 89.9                                   | 4.4  | 5.2  |
| 12-25      | 20                                        | 78   | 2    | 93.1                                     | 3.4  | 3.4  | 96.0                              | 2.0  | 2.0  | 89.5                                   | 5.3  | 4.9  |
| 25-50      | 19                                        | 79   | 2    | 92.9                                     | 2.6  | 4.3  | 96.0                              | 2.0  | 2.0  | 90.5                                   | 2.9  | 5.8  |
| 50-100     | 31                                        | 67   | 2    | 92.9                                     | 2.6  | 4.3  | 96.0                              | 2.0  | 2.0  | 91.3                                   | 2.8  | 5.8  |

<sup>a</sup>Site code number refers to Hiernaux et al. (2009a).

**Table S3. Coordinates (latitude, longitude) of the starting, centre and ending points of the sampling transects. The directions of the transects are indicated by NS (North-South), EW (East-West), NE (North-East) and SW (South-West).**

| <b>Site (#, transect)</b>     | <b>Starting Point (°N, °W)</b> | <b>Centre point (°N, °W)</b> | <b>Ending Point (°N, °W)</b> |
|-------------------------------|--------------------------------|------------------------------|------------------------------|
| <b>Agoufou NS (#17)</b>       | 15.34347, 1.48475              | 15.33927, 1.48413            | 15.33447, 1.48320            |
| <b>Agoufou EW (#17)</b>       | 15.34005, 1.47950              | 15.33927, 1.48413            | 15.33952, 1.48885            |
| <b>Bilantao NE-SW (#41)</b>   | 15.28956, 1.55867              | 15.28524, 1.55867            | 15.28091, 1.55867            |
| <b>Eguerit EW (#40)</b>       | 15.50522, 1.39240              | 15.50409, 1.39756            | 15.50297, 1.40272            |
| <b>Hombori_Hondo NS (#19)</b> | 15.32692, 1.69835              | 15.32240, 1.69828            | 15.31788, 1.69821            |
| <b>Hombori Hondo EW (#19)</b> | 15.32222, 1.69333              | 15.32240, 1.69828            | 15.32177, 1.70277            |
| <b>Kelma Forest EW (#21)</b>  | 15.21877, 1.56806              | 15.21887, 1.56574            | 15.21897, 1.56342            |
| <b>Kelma Herbs EW (#21)</b>   | 15.21877, 1.56806              | 15.21887, 1.56690            | 15.21887, 1.56574            |
| <b>Kelma Plain EW (#21b)</b>  | 15.21777, 1.56972              | 15.21749, 1.57154            | 15.21722, 1.57333            |
| <b>Tara NE-SW (#31)</b>       | 15.23260, 1.57943              | 15.23013, 1.58335            | 15.22824, 1.58757            |
| <b>Tara NW-SE (#31)</b>       | 15.22985, 1.57872              | 15.23013, 1.58335            | 15.23008, 1.58802            |
| <b>Timbador NS (#18)</b>      | 15.33680, 1.54683              | 15.33231, 1.54627            | 15.32782, 1.54570            |
| <b>Timbador EW (#18)</b>      | 15.33382, 1.54187              | 15.33231, 1.54627            | 15.33091, 1.55067            |

<sup>a</sup>Site code number refers to Hiernaux et al. (2009a)

**Table S4. Dates of hemispheric photograph acquisition over the 2005-2017 period.**

| <b>Agoufou EW (#17)</b> | <b>2005</b> | <b>2006</b> | <b>2007</b> | <b>2008</b> | <b>2009</b> | <b>2010</b> | <b>2011</b> |
|-------------------------|-------------|-------------|-------------|-------------|-------------|-------------|-------------|
|                         | 2005/06/06  | 2006/07/14  | 2007/07/16  | 2008/07/05  | 2009/07/06  | 2010/07/06  | 2011/07/08  |
|                         | 2005/06/17  | 2006/07/29  | 2007/07/26  | 2008/07/15  | 2009/07/16  | 2010/08/05  | 2011/07/14  |
|                         | 2005/06/24  | 2006/08/10  | 2007/07/29  | 2008/07/25  | 2009/07/28  | 2010/08/17  | 2011/07/18  |
|                         | 2005/07/04  | 2006/08/20  | 2007/07/30  | 2008/08/08  | 2009/08/06  | 2010/09/03  | 2011/07/24  |
|                         | 2005/07/17  | 2006/08/29  | 2007/08/05  | 2008/08/14  | 2009/08/16  | 2010/09/04  | 2011/08/10  |
|                         | 2005/07/24  | 2006/09/10  | 2007/08/13  | 2008/08/18  | 2009/08/26  | 2010/09/13  | 2011/08/21  |
|                         | 2005/07/30  | 2006/09/20  | 2007/08/14  | 2008/08/24  | 2009/08/31  | 2010/09/30  | 2011/08/26  |
|                         | 2005/08/03  | 2006/09/30  | 2007/08/23  | 2008/08/31  | 2009/09/03  |             | 2011/09/03  |
|                         | 2005/08/13  |             | 2007/08/27  | 2008/09/07  | 2009/09/05  |             | 2011/09/09  |
|                         | 2005/08/20  |             | 2007/09/06  | 2008/09/20  | 2009/09/15  |             |             |
|                         | 2005/08/24  |             | 2007/09/16  |             |             |             |             |
|                         | 2005/08/28  |             | 2007/09/26  |             |             |             |             |
|                         | 2005/09/28  |             |             |             |             |             |             |
|                         | <b>2012</b> | <b>2013</b> | <b>2014</b> | <b>2015</b> | <b>2016</b> | <b>2017</b> |             |
|                         | 2012/06/26  | 2013/06/05  | 2014/07/05  | 2015/07/11  | 2016/06/24  | 2017/07/15  |             |
|                         | 2012/07/10  | 2013/07/07  | 2014/08/16  | 2015/07/20  | 2016/07/08  | 2017/07/23  |             |
|                         | 2012/07/24  | 2013/07/16  | 2014/08/27  | 2015/07/30  | 2016/07/18  | 2017/08/03  |             |
|                         | 2012/08/04  | 2013/07/31  | 2014/09/05  | 2015/08/10  | 2016/07/28  | 2017/08/13  |             |
|                         | 2012/08/14  | 2013/08/19  | 2014/09/15  | 2015/08/20  | 2016/08/11  | 2017/08/22  |             |
|                         | 2012/08/25  | 2013/08/29  | 2014/09/25  | 2015/08/29  | 2016/08/27  | 2017/09/03  |             |
|                         | 2012/09/04  | 2013/09/09  |             | 2015/09/09  | 2016/09/10  | 2017/09/14  |             |
|                         | 2012/09/18  | 2013/09/19  |             | 2015/09/16  | 2016/09/28  | 2017/09/25  |             |
|                         | 2012/09/29  | 2013/09/29  |             | 2015/09/27  |             |             |             |
|                         |             | 2013/10/09  |             |             |             |             |             |
| <b>Agoufou NS (#17)</b> | <b>2005</b> | <b>2006</b> | <b>2007</b> | <b>2008</b> | <b>2009</b> | <b>2010</b> | <b>2011</b> |

|                               |             |             |                                                                    |                                                                    |                                                                                                              |                          |                                                                                  |
|-------------------------------|-------------|-------------|--------------------------------------------------------------------|--------------------------------------------------------------------|--------------------------------------------------------------------------------------------------------------|--------------------------|----------------------------------------------------------------------------------|
|                               | -           | -           | 2007/07/30<br>2007/08/14<br>2007/08/27                             | 2008/07/25<br>2008/08/18<br>2008/08/24<br>2008/08/31<br>2008/09/07 | 2009/07/06<br>2009/07/16<br>2009/07/28<br>2009/08/06<br>2009/08/16<br>2009/08/26<br>2009/08/31<br>2009/09/05 | 2010/07/06               | 2011/07/18<br>2011/07/24<br>2011/08/10<br>2011/08/21<br>2011/08/26<br>2011/09/09 |
|                               | <b>2012</b> | <b>2013</b> | <b>2014</b>                                                        | <b>2015</b>                                                        | <b>2016</b>                                                                                                  | <b>2017</b>              |                                                                                  |
|                               | -           | -           | -                                                                  | -                                                                  | -                                                                                                            | -                        |                                                                                  |
| <b>Timbador EW (#18)</b>      | <b>2005</b> | <b>2006</b> | <b>2007</b>                                                        | <b>2008</b>                                                        | <b>2009</b>                                                                                                  | <b>2010</b>              | <b>2011</b>                                                                      |
|                               | -           | -           | 2007/08/01<br>2007/08/16                                           | 2008/08/12<br>2008/08/18<br>2008/08/23<br>2008/09/02               | 2009/07/11<br>2009/07/30<br>2009/08/08<br>2009/08/27                                                         | -                        | -                                                                                |
|                               | <b>2012</b> | <b>2013</b> | <b>2014</b>                                                        | <b>2015</b>                                                        | <b>2016</b>                                                                                                  | <b>2017</b>              |                                                                                  |
|                               | -           | -           | -                                                                  | -                                                                  | -                                                                                                            | -                        |                                                                                  |
| <b>Timbador NS (#18)</b>      | <b>2005</b> | <b>2006</b> | <b>2007</b>                                                        | <b>2008</b>                                                        | <b>2009</b>                                                                                                  | <b>2010</b>              | <b>2011</b>                                                                      |
|                               |             |             | 2007/07/18<br>2007/07/30<br>2007/08/01<br>2007/08/16<br>2007/09/08 | 2008/07/22<br>2008/07/26<br>2008/08/12<br>2008/08/18<br>2008/09/02 | 2009/07/11<br>2009/07/30<br>2009/08/08<br>2009/08/18<br>2009/08/27                                           | 2010/07/05<br>2010/08/05 | 2011/07/18<br>2011/08/10<br>2011/08/21<br>2011/09/09                             |
|                               | <b>2012</b> | <b>2013</b> | <b>2014</b>                                                        | <b>2015</b>                                                        | <b>2016</b>                                                                                                  | <b>2017</b>              |                                                                                  |
|                               | -           | -           | 2014/08/27                                                         | -                                                                  | -                                                                                                            | -                        |                                                                                  |
| <b>Hombori Hondo EW (#19)</b> | <b>2005</b> | <b>2006</b> | <b>2007</b>                                                        | <b>2008</b>                                                        | <b>2009</b>                                                                                                  | <b>2010</b>              | <b>2011</b>                                                                      |
|                               | -           | -           | 2007/08/01<br>2007/08/16                                           | 2008/08/12<br>2008/08/24<br>2008/09/04                             | 2009/07/05<br>2009/07/30<br>2009/08/08<br>2009/08/28                                                         | -                        | -                                                                                |

|                               |                                                                                                                                          |                                                                                                                                          |                                                                                                                                          |                                                                                                                                          | 2009/09/30                                                                                                                               |                                                                                                                                                        |                                                                                  |
|-------------------------------|------------------------------------------------------------------------------------------------------------------------------------------|------------------------------------------------------------------------------------------------------------------------------------------|------------------------------------------------------------------------------------------------------------------------------------------|------------------------------------------------------------------------------------------------------------------------------------------|------------------------------------------------------------------------------------------------------------------------------------------|--------------------------------------------------------------------------------------------------------------------------------------------------------|----------------------------------------------------------------------------------|
|                               | 2012                                                                                                                                     | 2013                                                                                                                                     | 2014                                                                                                                                     | 2015                                                                                                                                     | 2016                                                                                                                                     | 2017                                                                                                                                                   |                                                                                  |
|                               | -                                                                                                                                        | -                                                                                                                                        | -                                                                                                                                        | -                                                                                                                                        | -                                                                                                                                        | -                                                                                                                                                      |                                                                                  |
| <b>Hombori Hondo NS (#19)</b> | 2005                                                                                                                                     | 2006                                                                                                                                     | 2007                                                                                                                                     | 2008                                                                                                                                     | 2009                                                                                                                                     | 2010                                                                                                                                                   | 2011                                                                             |
|                               | -                                                                                                                                        | -                                                                                                                                        | 2007/07/18<br>2007/08/01<br>2007/08/16<br>2007/09/09                                                                                     | 2008/08/12<br>2008/08/24<br>2008/09/04<br>2008/09/26                                                                                     | 2009/07/05<br>2009/07/30<br>2009/08/08<br>2009/08/18<br>2009/08/28                                                                       | 2010/07/08<br>2010/08/04                                                                                                                               | 2011/08/11<br>2011/09/10                                                         |
|                               | 2012                                                                                                                                     | 2013                                                                                                                                     | 2014                                                                                                                                     | 2015                                                                                                                                     | 2016                                                                                                                                     | 2017                                                                                                                                                   |                                                                                  |
|                               | 2012/09/06<br>2012/09/14<br>2012/09/24                                                                                                   | 2013/06/06<br>2013/07/08<br>2013/07/20<br>2013/08/01<br>2013/08/12<br>2013/08/22<br>2013/08/31<br>2013/09/13                             | 2014/07/06<br>2014/08/06<br>2014/08/21<br>2014/08/26<br>2014/09/05<br>2014/09/16<br>2014/09/27                                           | 2015/07/08<br>2015/07/18<br>2015/07/29<br>2015/08/09<br>2015/08/19<br>2015/08/30<br>2015/09/07<br>2015/09/17                             | 2016/07/03<br>2016/07/20<br>2016/07/30<br>2016/08/10<br>2016/08/20<br>2016/08/31<br>2016/09/09<br>2016/09/18<br>2016/09/26               | 2017/06/14<br>2017/06/24<br>2017/07/04<br>2017/07/13<br>2017/07/22<br>2017/08/02<br>2017/08/11<br>2017/08/21<br>2017/09/02<br>2017/09/13<br>2017/09/22 |                                                                                  |
| <b>Kelma Forest EW (#21)</b>  | 2005                                                                                                                                     | 2006                                                                                                                                     | 2007                                                                                                                                     | 2008                                                                                                                                     | 2009                                                                                                                                     | 2010                                                                                                                                                   | 2011                                                                             |
|                               | 2005/04/16<br>2005/04/21<br>2005/05/17<br>2005/06/03<br>2005/06/26<br>2005/07/03<br>2005/07/22<br>2005/08/02<br>2005/08/18<br>2005/08/30 | 2006/03/07<br>2006/04/06<br>2006/06/23<br>2006/07/03<br>2006/07/15<br>2006/07/24<br>2006/08/12<br>2006/08/26<br>2006/09/12<br>2006/09/20 | 2007/01/20<br>2007/02/19<br>2007/03/31<br>2007/05/10<br>2007/06/07<br>2007/06/23<br>2007/07/05<br>2007/07/15<br>2007/07/28<br>2007/08/03 | 2008/01/13<br>2008/02/15<br>2008/03/20<br>2008/04/15<br>2008/06/03<br>2008/06/20<br>2008/07/08<br>2008/07/16<br>2008/07/26<br>2008/08/10 | 2009/03/14<br>2009/06/06<br>2009/07/08<br>2009/07/17<br>2009/07/29<br>2009/08/07<br>2009/08/17<br>2009/08/27<br>2009/10/07<br>2009/04/11 | 2010/02/03<br>2010/04/19<br>2010/07/09<br>2010/08/09<br>2010/09/08<br>2010/09/29                                                                       | 2011/06/06<br>2011/07/07<br>2011/07/22<br>2011/08/09<br>2011/08/19<br>2011/09/08 |



|  |                          |                                                                                                                                                                                                  |                                                                                                                                                                                                                                            |                                                                                                                                                                                                                                                                                                                  |                                                                                                                                                                                                                                                                                                                  |                                                                                                                                                                                                                                                                                                                                              |  |
|--|--------------------------|--------------------------------------------------------------------------------------------------------------------------------------------------------------------------------------------------|--------------------------------------------------------------------------------------------------------------------------------------------------------------------------------------------------------------------------------------------|------------------------------------------------------------------------------------------------------------------------------------------------------------------------------------------------------------------------------------------------------------------------------------------------------------------|------------------------------------------------------------------------------------------------------------------------------------------------------------------------------------------------------------------------------------------------------------------------------------------------------------------|----------------------------------------------------------------------------------------------------------------------------------------------------------------------------------------------------------------------------------------------------------------------------------------------------------------------------------------------|--|
|  | 2005/09/18<br>2005/09/29 | 2006/10/01<br>2006/10/17<br>2006/11/22<br>2006/12/06<br>2006/12/14                                                                                                                               | 2007/08/13<br>2007/08/26<br>2007/09/08<br>2007/09/19<br>2007/09/29<br>2007/11/17                                                                                                                                                           | 2008/08/19<br>2008/08/29<br>2008/09/05<br>2008/09/21<br>2008/09/29<br>2008/11/01<br>2008/12/17                                                                                                                                                                                                                   |                                                                                                                                                                                                                                                                                                                  |                                                                                                                                                                                                                                                                                                                                              |  |
|  | <b>2012</b>              | <b>2013</b>                                                                                                                                                                                      | <b>2014</b>                                                                                                                                                                                                                                | <b>2015</b>                                                                                                                                                                                                                                                                                                      | <b>2016</b>                                                                                                                                                                                                                                                                                                      | <b>2017</b>                                                                                                                                                                                                                                                                                                                                  |  |
|  | -                        | 2013/03/04<br>2013/04/13<br>2013/05/04<br>2013/06/05<br>2013/07/07<br>2013/07/18<br>2013/08/01<br>2013/08/10<br>2013/08/20<br>2013/08/30<br>2013/09/12<br>2013/09/21<br>2013/09/30<br>2013/10/11 | 2014/01/09<br>2014/02/15<br>2014/03/09<br>2014/04/09<br>2014/05/08<br>2014/06/07<br>2014/07/06<br>2014/08/05<br>2014/08/21<br>2014/08/28<br>2014/09/06<br>2014/09/15<br>2014/09/26<br>2014/10/07<br>2014/10/17<br>2014/11/15<br>2014/12/29 | 2015/01/25<br>2015/02/18<br>2015/03/29<br>2015/04/20<br>2015/05/25<br>2015/06/22<br>2015/07/30<br>2015/08/12<br>2015/08/22<br>2015/08/31<br>2015/09/10<br>2015/09/18<br>2015/09/28<br>2015/10/08<br>2015/10/23<br>2015/11/02<br>2015/11/13<br>2015/11/20<br>2015/11/30<br>2015/12/10<br>2015/12/20<br>2015/12/30 | 2016/01/11<br>2016/01/21<br>2016/01/29<br>2016/02/14<br>2016/02/29<br>2016/03/28<br>2016/04/29<br>2016/05/30<br>2016/06/29<br>2016/07/29<br>2016/08/17<br>2016/08/31<br>2016/09/19<br>2016/09/29<br>2016/10/13<br>2016/10/20<br>2016/10/27<br>2016/11/07<br>2016/11/18<br>2016/11/28<br>2016/12/17<br>2016/12/29 | 2017/01/14<br>2017/01/25<br>2017/02/18<br>2017/02/28<br>2017/03/17<br>2017/03/30<br>2017/04/27<br>2017/05/18<br>2017/05/28<br>2017/06/19<br>2017/06/28<br>2017/07/05<br>2017/07/16<br>2017/07/24<br>2017/08/04<br>2017/08/14<br>2017/08/23<br>2017/09/06<br>2017/09/17<br>2017/09/27<br>2017/10/07<br>2017/10/17<br>2017/10/28<br>2017/11/09 |  |

|                                        |             |             |             |             |             |                                                                    |             |  |
|----------------------------------------|-------------|-------------|-------------|-------------|-------------|--------------------------------------------------------------------|-------------|--|
|                                        |             |             |             |             |             | 2017/11/19<br>2017/11/29<br>2017/12/08<br>2017/12/17<br>2017/12/30 |             |  |
| <b>Kelma Herbs EW</b><br><b>(#21)</b>  | <b>2005</b> | <b>2006</b> | <b>2007</b> | <b>2008</b> | <b>2009</b> | <b>2010</b>                                                        | <b>2011</b> |  |
|                                        | 2005/06/26  | 2006/07/24  | 2007/07/15  | 2008/07/08  | 2009/08/17  | 2010/07/09                                                         | 2011/07/22  |  |
|                                        | 2005/07/03  | 2006/08/12  | 2007/07/28  | 2008/07/16  | 2009/08/27  | 2010/08/09                                                         | 2011/08/09  |  |
|                                        | 2005/07/22  | 2006/08/26  | 2007/08/03  | 2008/07/26  | 2009/10/07  |                                                                    | 2011/08/19  |  |
|                                        | 2005/08/18  | 2006/09/12  | 2007/08/13  | 2008/08/10  | 2009/11/04  |                                                                    |             |  |
|                                        | 2005/08/30  | 2006/09/20  | 2007/08/26  | 2008/08/19  |             |                                                                    |             |  |
|                                        | 2005/09/18  | 2006/10/01  | 2007/09/08  | 2008/08/29  |             |                                                                    |             |  |
|                                        |             | 2006/10/17  | 2007/09/19  | 2008/09/05  |             |                                                                    |             |  |
|                                        |             | 2006/11/22  | 2007/09/29  | 2008/09/21  |             |                                                                    |             |  |
|                                        |             |             | 2007/11/17  | 2008/09/29  |             |                                                                    |             |  |
|                                        |             | <b>2012</b> | <b>2013</b> | <b>2014</b> | <b>2015</b> | <b>2016</b>                                                        | <b>2017</b> |  |
|                                        |             | 2012/07/25  | 2013/08/30  | 2014/08/21  | 2015/07/20  | 2016/08/17                                                         | 2017/08/04  |  |
|                                        |             | 2012/08/06  | 2013/09/12  | 2014/08/28  | 2015/07/30  | 2016/08/31                                                         | 2017/08/14  |  |
|                                        | 2012/08/17  | 2013/09/21  | 2014/09/06  | 2015/08/12  | 2016/09/19  | 2017/08/23                                                         |             |  |
|                                        | 2012/08/26  | 2013/09/30  | 2014/09/15  | 2015/08/22  | 2016/09/29  | 2017/09/06                                                         |             |  |
|                                        | 2012/09/07  | 2013/10/11  | 2014/09/26  | 2015/08/31  | 2016/10/13  | 2017/09/17                                                         |             |  |
|                                        | 2012/09/19  |             | 2014/10/07  | 2015/09/10  | 2016/10/20  | 2017/09/27                                                         |             |  |
|                                        | 2012/09/30  |             | 2014/10/17  | 2015/09/18  | 2016/10/27  | 2017/10/07                                                         |             |  |
|                                        | 2012/10/13  |             |             | 2015/09/28  | 2016/11/07  | 2017/10/17                                                         |             |  |
|                                        | 2012/10/24  |             |             | 2015/10/08  | 2016/11/18  | 2017/10/28                                                         |             |  |
|                                        | 2012/10/30  |             |             | 2015/10/23  | 2016/11/28  |                                                                    |             |  |
|                                        | 2012/11/10  |             |             | 2015/11/02  |             |                                                                    |             |  |
| <b>Kelma Plain EW</b><br><b>(#21b)</b> | <b>2005</b> | <b>2006</b> | <b>2007</b> | <b>2008</b> | <b>2009</b> | <b>2010</b>                                                        | <b>2011</b> |  |
|                                        | -           | -           | -           | 2008/08/10  | 2009/08/07  | -                                                                  | 2011/07/22  |  |
|                                        |             |             |             |             | 2009/08/17  |                                                                    | 2011/08/09  |  |
|                                        |             |             |             |             | 2009/08/27  |                                                                    | 2011/08/19  |  |
|                                        |             |             |             | 2009/09/16  |             |                                                                    |             |  |



|                            |             |             |             |                                        |             | 2017/10/07  |             |
|----------------------------|-------------|-------------|-------------|----------------------------------------|-------------|-------------|-------------|
| <b>Tara NWSE (#31)</b>     | <b>2005</b> | <b>2006</b> | <b>2007</b> | <b>2008</b>                            | <b>2009</b> | <b>2010</b> | <b>2011</b> |
|                            | -           | -           | -           | 2008/08/18<br>2008/08/25<br>2008/09/05 | 2009/08/28  | -           | -           |
|                            | <b>2012</b> | <b>2013</b> | <b>2014</b> | <b>2015</b>                            | <b>2016</b> | <b>2017</b> |             |
|                            | -           | -           | -           | -                                      | -           | -           |             |
| <b>Eguerit EW (#40)</b>    | <b>2005</b> | <b>2006</b> | <b>2007</b> | <b>2008</b>                            | <b>2009</b> | <b>2010</b> | <b>2011</b> |
|                            | -           | -           | -           | 2008/08/20                             | -           | -           | -           |
|                            | <b>2012</b> | <b>2013</b> | <b>2014</b> | <b>2015</b>                            | <b>2016</b> | <b>2017</b> |             |
|                            | -           | -           | -           | -                                      | -           | -           | -           |
| <b>Bilantao NESW (#41)</b> | <b>2005</b> | <b>2006</b> | <b>2007</b> | <b>2008</b>                            | <b>2009</b> | <b>2010</b> | <b>2011</b> |
|                            | -           | -           | 2007/07/30  | 2008/08/17<br>2008/08/26               | 2009/09/01  | -           | -           |
|                            | <b>2012</b> | <b>2013</b> | <b>2014</b> | <b>2015</b>                            | <b>2016</b> | <b>2017</b> |             |
|                            | -           | 2013/07/13  | -           | -                                      | -           | -           |             |
